# Supplementary material for: Tuning the selectivity of visible light-driven hydroxylation of benzene to phenol by using Cu, Fe and V oxides supported on N-doped TiO2
Source: Royal Society of Chemistry journal article supplement (doi:10.1039/d3gc02028b), 2023-01-01
Supplement: d3gc02028b1.pdf [file d3gc02028b1.pdf]

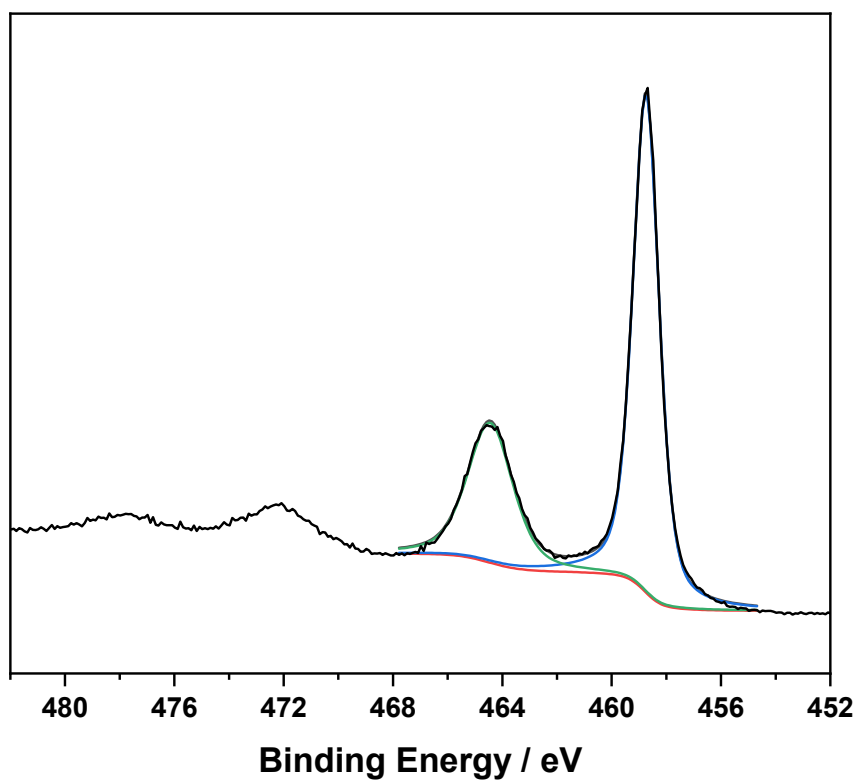

**Figure S1.** Ti2p region for N-TiO<sub>2</sub> samples.

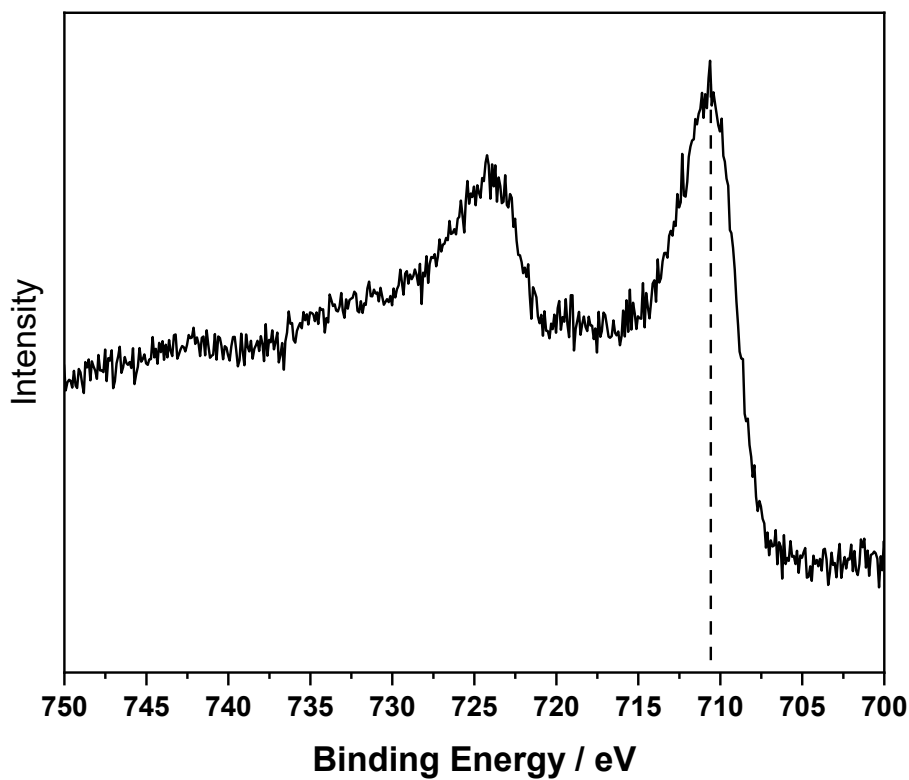

**Figure S2.** Fe2p region for Fe/N-TiO<sub>2</sub> samples. Average maximum position for Fe2p<sub>3/2</sub> is indicated by a dashed line.

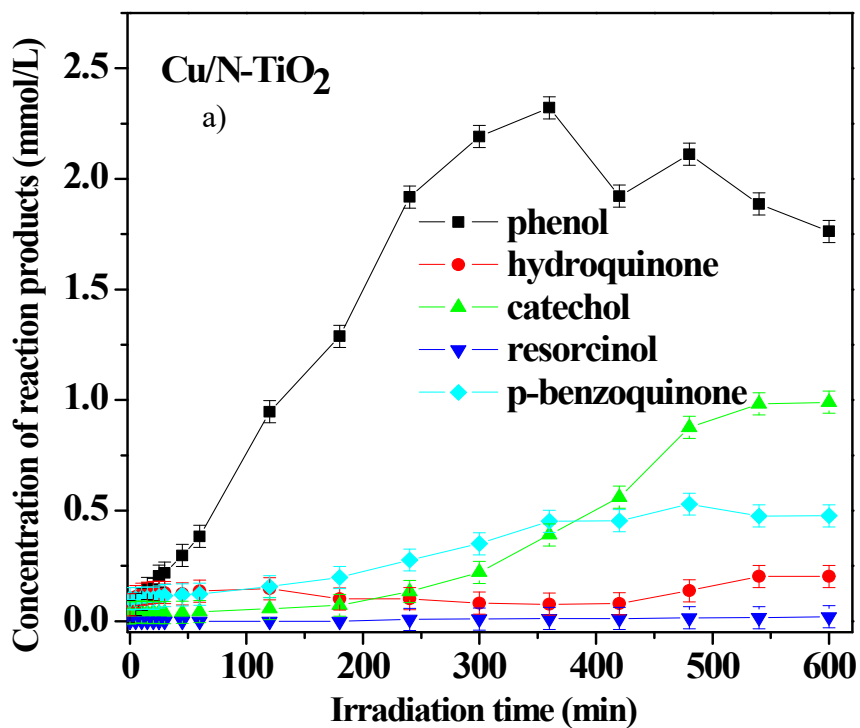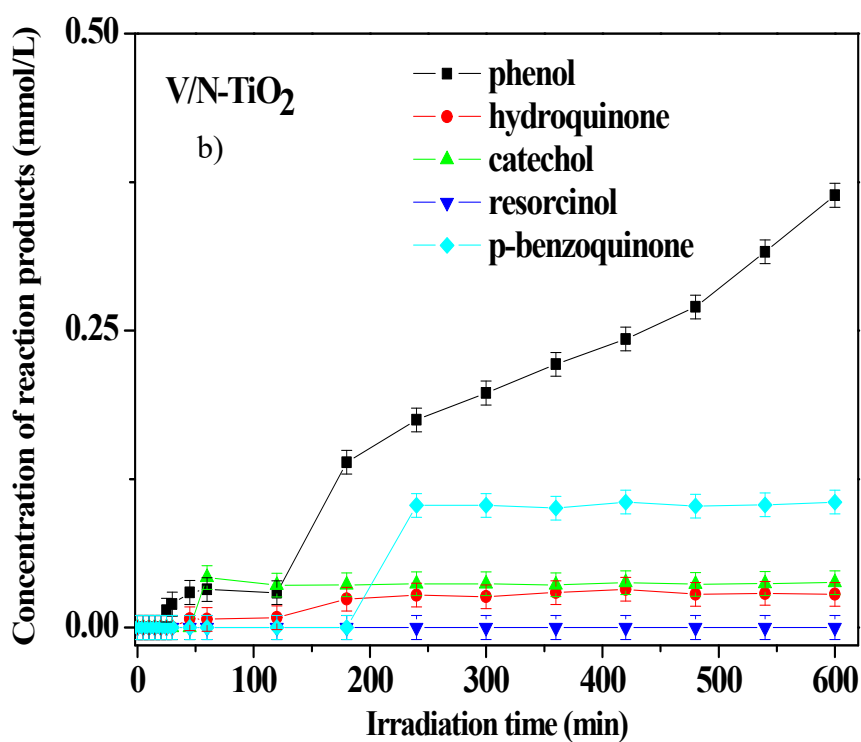

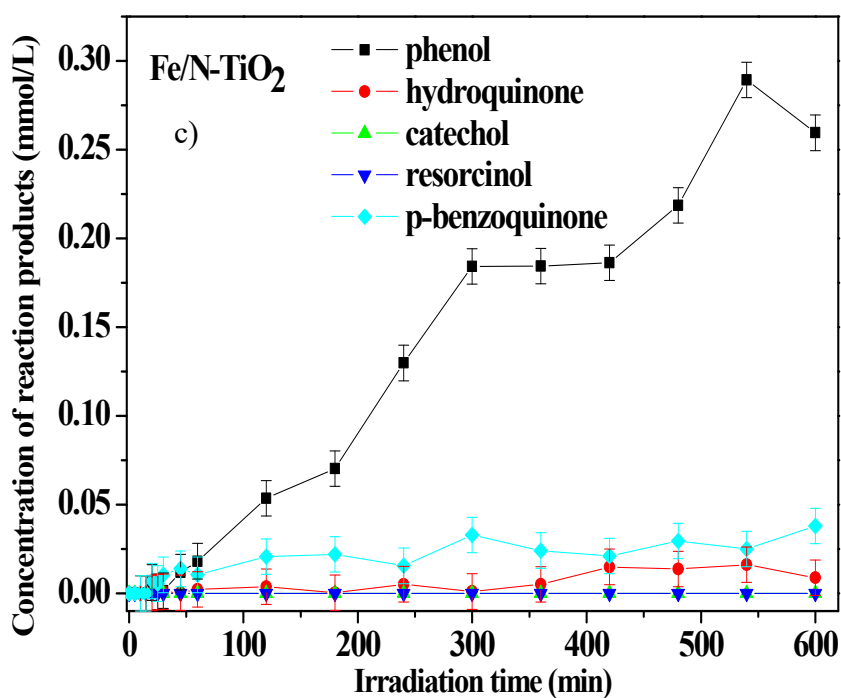

**Figure S3.** a) Reaction products concentration (mmol/L) as function of irradiation time (min) with Cu/ N-TiO<sub>2</sub> photocatalyst under visible light irradiation; b) Reaction products concentration (mmol/L) as function of irradiation time (min) with V/ N-TiO<sub>2</sub> photocatalyst under visible light irradiation c) Reaction products concentration (mmol/L) as function of irradiation time (min) with Fe/ N-TiO<sub>2</sub> photocatalyst under visible light irradiation.
